# Supplementary material for: Smart poly(amidoamine) dendron-functionalized magnetic graphene oxide for cancer therapy
Source: Royal Society of Chemistry journal article supplement (doi:10.1039/d1nj03845a), 2022-01-01
Supplement: d1nj03845a1.pdf [file d1nj03845a1.pdf]

## Smart Poly(amidoamine) Dendrons Functionalized Magnetic Graphene Oxide for Cancer Therapy

Azar Ramezanpour<sup>a</sup>, Kazem Karami<sup>a\*</sup>, Mahshid Kharaziha<sup>b</sup>, Parvaneh Bayat<sup>a</sup>, Nasrin Jamshidian<sup>a</sup>

<sup>a</sup> Department of Chemistry, Isfahan University of Technology, Isfahan 84156-83111, Iran

<sup>b</sup> Department of Materials Engineering, Isfahan University of Technology, Isfahan 84156-83111, Iran

\*E-mail: karami@cc.iut.ac.ir. Tel: +983133913239; fax: +983133912350

### 1. Synthesis of *trans*-[Pd(Naph)<sub>2</sub>(Cl)<sub>2</sub>] (Pd(II) complex)

In order to synthesize *trans*-[Pd(Naph)<sub>2</sub>(Cl)<sub>2</sub>], Naphcon (2 mmol) was added to solution of Pd(OAc)<sub>2</sub> (1 mmol) followed by the addition of NaOH solution (2 mmol). The obtained solution was stirred at room temperature for 24 h. The resulted orange solid was dissolved in acetone and an aqueous NaCl solution was supplemented to it, stirred for 24 h at ambient temperature and air dried. The obtained yellow precipitate (*trans*-[Pd(Naph)<sub>2</sub>(Cl)<sub>2</sub>]) was washed with distilled water to the remove excess NaCl. The yellow precipitate was recrystallized in ethanol.

**Naphcon:** FT-IR (KBr, cm<sup>-1</sup>):  $\nu$  (C-H<sub>aromatic</sub>)= 3053,  $\nu$  (C-H<sub>aliphatic</sub>)= 2810-2922,  $\nu$  (-NH<sub>2</sub><sup>+</sup>)= 2688,  $\nu$  (C=N)= 1620,  $\nu$  (C=C<sub>aromatic</sub>)= 1489. <sup>1</sup>H NMR (500.13 MHz, DMSO-d<sub>6</sub>, ppm):  $\delta$ = 3.79 (s, 4H, CH<sub>2</sub>), 4.41 (s, 2H, CH<sub>2</sub>), 7.5-8.11 (7H, aromatic rings), 10.52 (s, 2H, NH<sub>2</sub><sup>+</sup>).

***Trans*-[Pd(Naph)<sub>2</sub>(Cl)<sub>2</sub>]:** Yield: 73%, Anal. Calc. for C<sub>28</sub>H<sub>28</sub>Cl<sub>2</sub>N<sub>4</sub>Pd (%): C, 56.25; H, 4.72; N, 9.37. Found: C, 55.98; H, 4.65; N, 9.23. FT-IR (KBr, cm<sup>-1</sup>):  $\nu$  (N-H)= 3407,  $\nu$  (C-H<sub>aromatic</sub>)= 3052,  $\nu$  (C-H<sub>aliphatic</sub>)= 2850-2927,  $\nu$  (C=N)= 1609,  $\nu$  (C=C<sub>aromatic</sub>)= 1520. <sup>1</sup>H NMR (500.13 MHz, DMSO-d<sub>6</sub>, ppm):  $\delta$ = 11.93 (br s, -NH), 7.36-8.38 (m, 14H, aromatic rings), 4.42 (s, 2H, -CH<sub>a</sub>), 4.24 (s, 2H, -CH<sub>a</sub>), 3.86 (t, 2H, -CH<sub>2</sub>, <sup>3</sup>J= 10 Hz), 3.72 (t, 2H, -CH<sub>2</sub>, <sup>3</sup>J= 10 Hz), 3.54 (t, 2H, -CH<sub>2</sub>, <sup>3</sup>J= 10 Hz), 3.41 (t, 2H, -CH<sub>2</sub>).

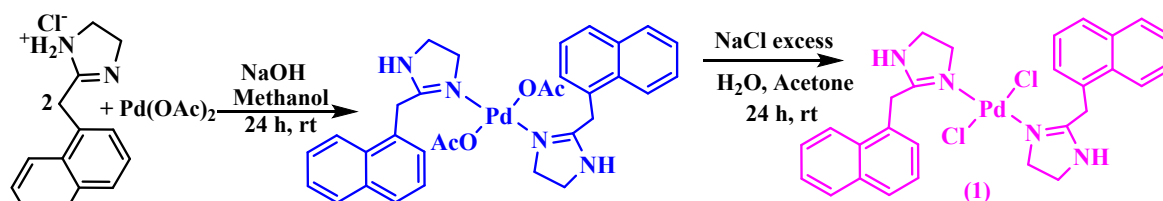

Scheme. S1: Synthetic procedure of the Pd(II) complex (1)

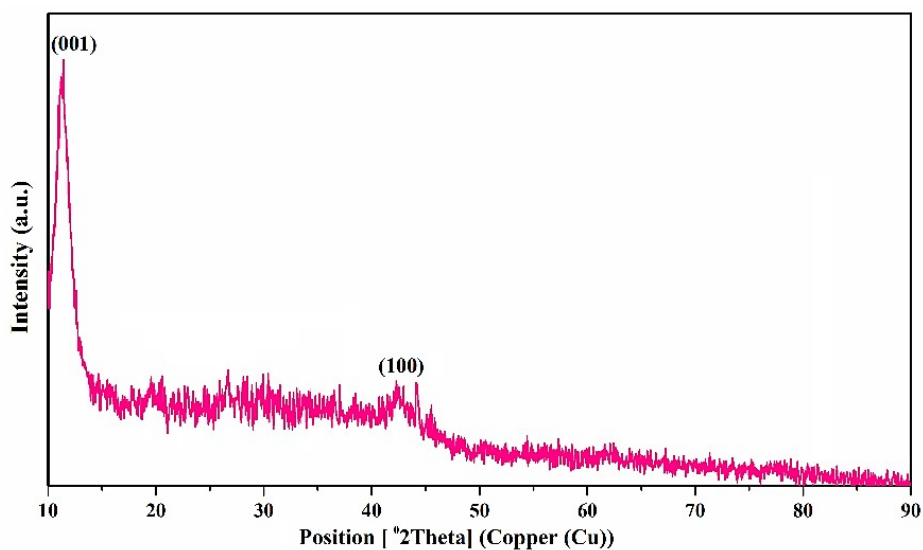

**Fig. S1:** XRD pattern of GO

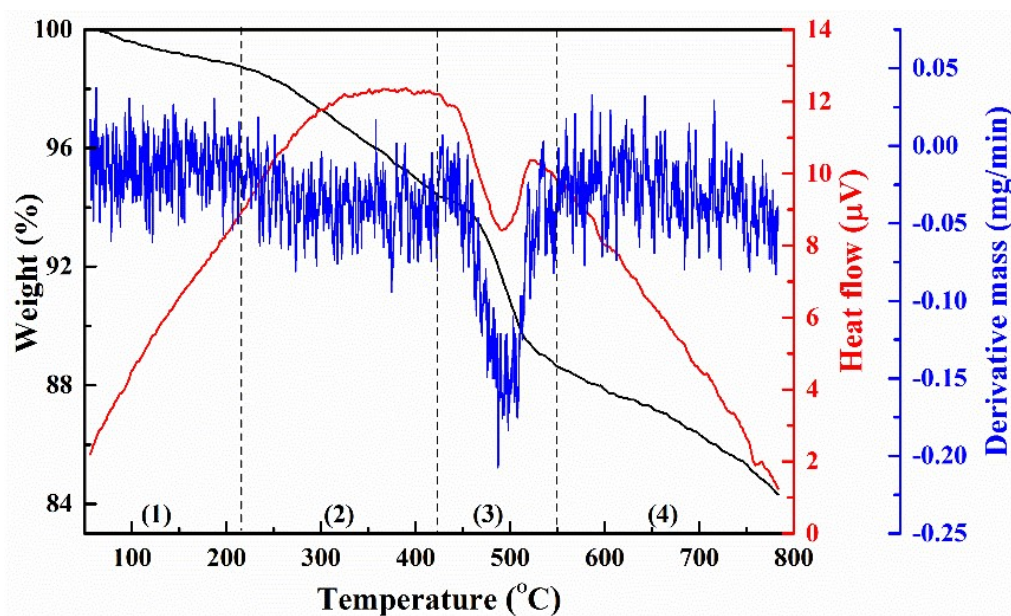

**Fig. S2:** TG/DTG/DTA curves of mG-NH<sub>2</sub> nanocomposite under argon flow and heating rate of 10 °C min<sup>-1</sup>

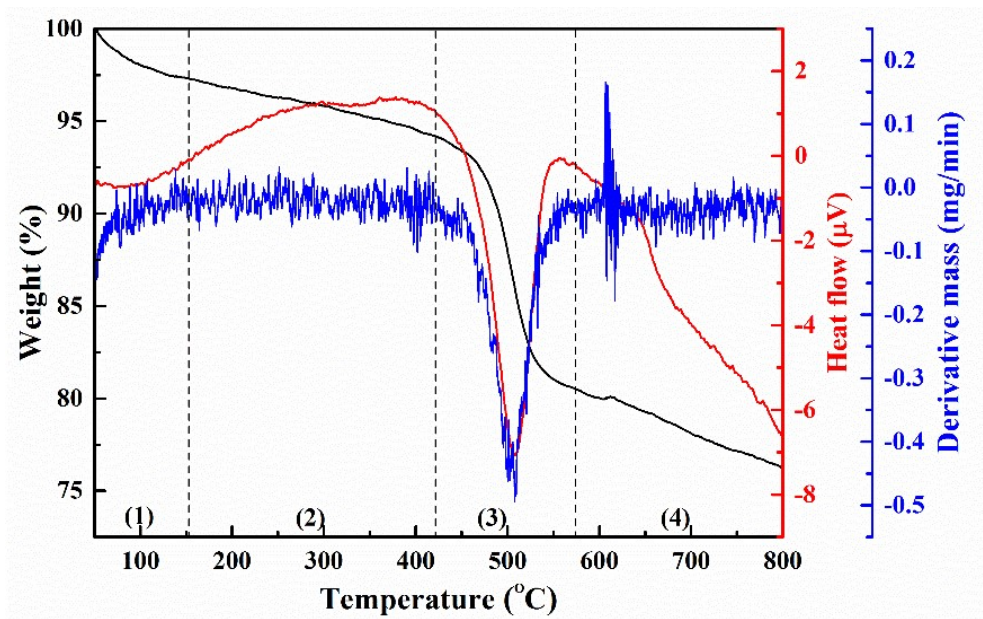

**Fig. S3:** TG/DTG/DTA curves of mGG3 nanocomposite under argon flow and heating rate of  $10\text{ }^{\circ}\text{C min}^{-1}$

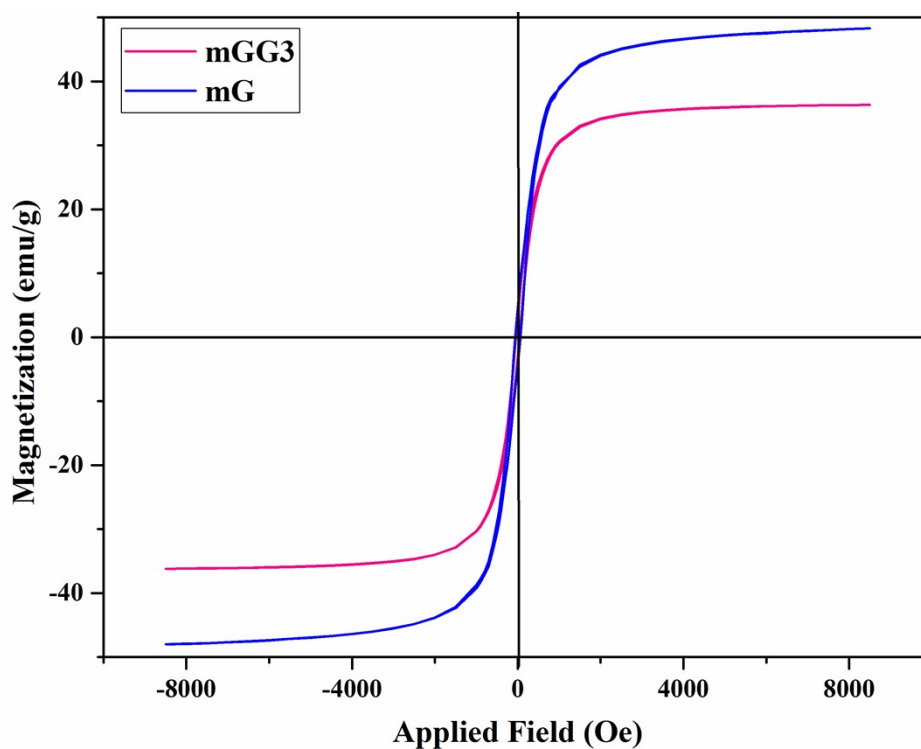

**Fig. S4:** Magnetization as a function of the applied magnetic field of the mG and mGG3 nanocomposites

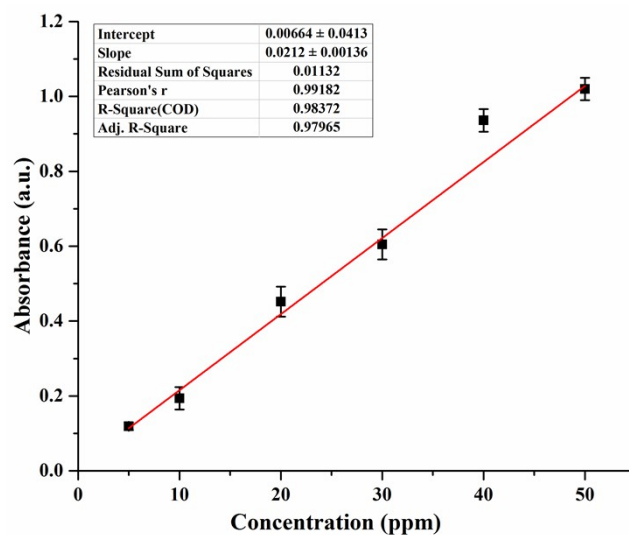

Fig. S5: Calibration curve of Pd(II) complex in water for optimizing loading condition

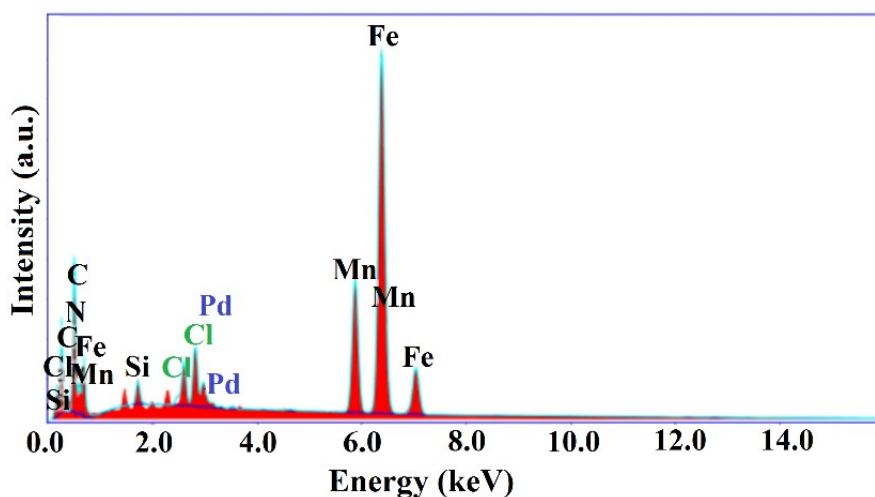

Fig. S6: EDAX spectrum of Pd(II) complex@mGG3F system

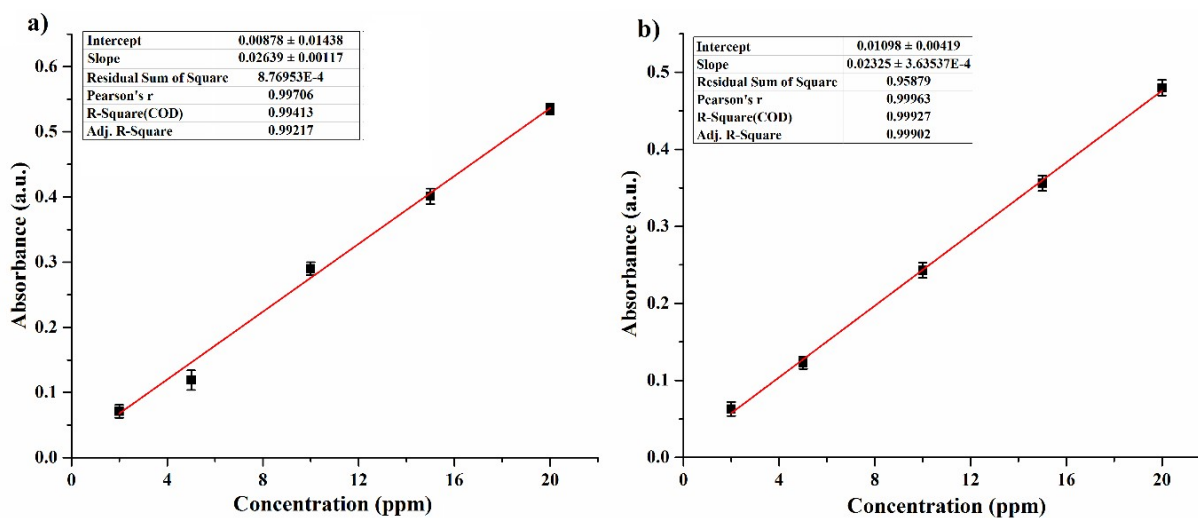

Fig. S7: Calibration curves of Pd(II) complex in PBS a) pH=7.2 and b) pH= 5.4 for *in vitro* release studies

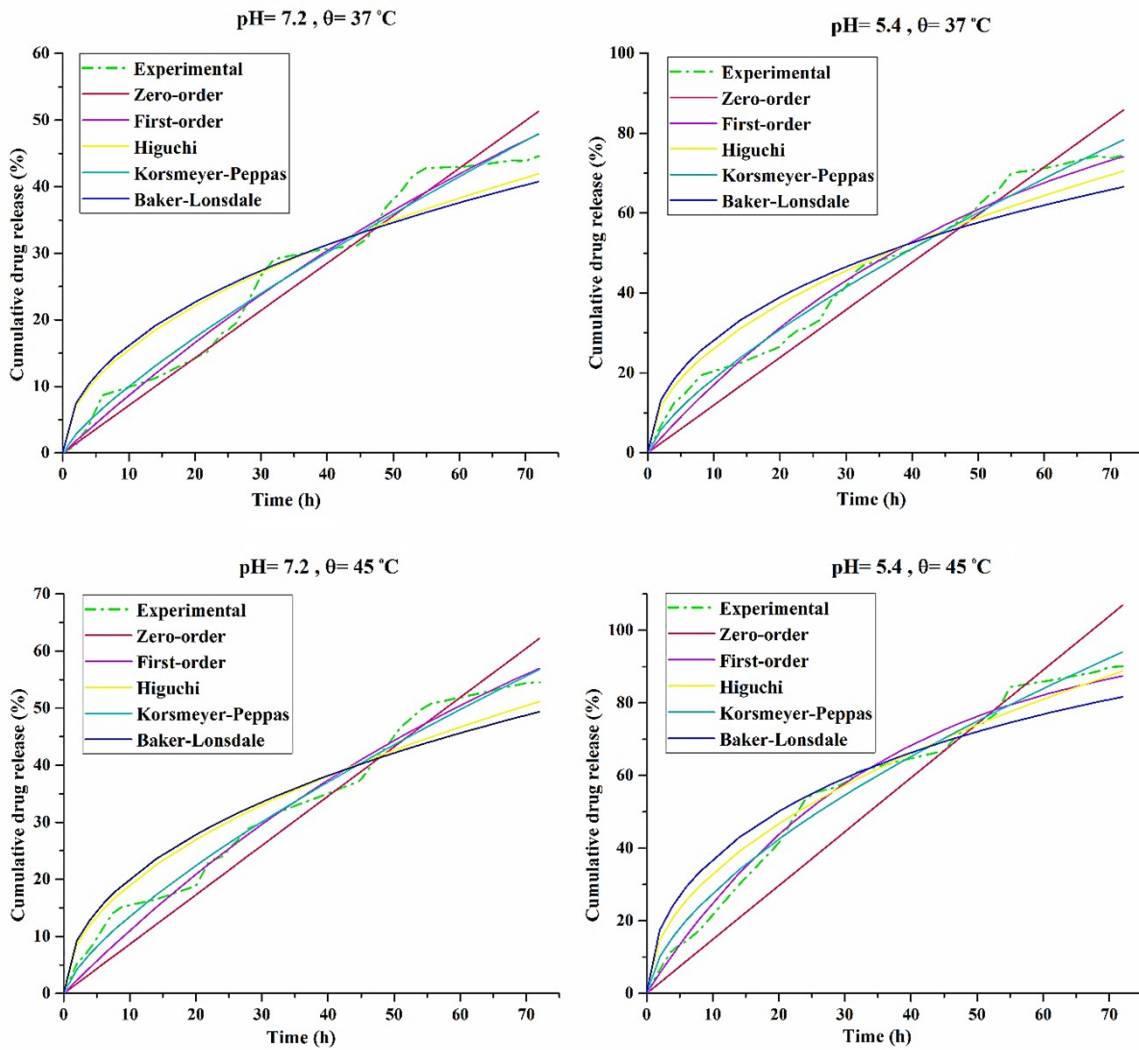

**Fig. S8:** Experimental (green dashed line) and predicted models (colored lines) of the cumulative release

- Equations of different kinetic models:

(1) Zero-order:  $F = k_0 \cdot t$

(2) First-order:  $F = 1 - \exp(-k_1 t)$

(3) Higuchi:  $F = k_H \cdot t^{0.5}$

(4) Korsmeyer–Peppas:  $F = k_{KP} \cdot t^n$

(5) Baker-Lonsdale:  $3/2[1-(1-F)^{2/3}]$

$-F = k_{BL} \cdot t$

In these equations,  $k_0$ ,  $k_1$ ,  $k_H$ ,  $k_{KP}$  and  $k_{BL}$ ,  $t$  and  $F$  are parameter of models, time and cumulative release, respectively.

**Table. S1:** Data of the optimization loading condition

| <b>Optimized factor</b>    | <b>amount</b> | <b>LC (%)</b> | <b>EE (%)</b> |
|----------------------------|---------------|---------------|---------------|
| <b>concentration (ppm)</b> | 80            | 5.00          | 62.63         |
|                            | 160           | 11.71         | 73.32         |
|                            | 200           | 14.76         | 73.93         |
|                            | 240           | 17.71         | 73.95         |
|                            | 280           | 19.30         | 69.05         |
| <b>time (h)</b>            | 12            | 9.96          | 41.57         |
|                            | 24            | 17.72         | 73.97         |
|                            | 48            | 15.31         | 63.89         |
|                            | 72            | 2.71          | 11.32         |
| <b>temperature (°C)</b>    | 27            | 17.70         | 73.93         |
|                            | 35            | 16.89         | 70.36         |
|                            | 45            | 6.50          | 27.16         |
|                            | 55            | 2.53          | 12.59         |

**Table. S2:** Experimental and predicted cumulative release values for various kinetic models at pH=7.2 and temperature 37 °C

| Time (h) | CDR (%)      |            |             |         |                  |                |
|----------|--------------|------------|-------------|---------|------------------|----------------|
|          | Experimental | predicted  |             |         |                  |                |
|          |              | zero-order | first-order | Higuchi | Korsmeyer-Peppas | Baker-Lonsdale |
| 0        | 0            | 0.00       | 0.00        | 0.00    | 0.00             | 0.06           |
| 2        | 1.19617      | 1.43       | 1.79        | 6.99    | 2.79             | 7.44           |
| 4        | 4.21351      | 2.85       | 3.56        | 9.88    | 4.84             | 10.45          |
| 6        | 8.67922      | 4.28       | 5.29        | 12.11   | 6.68             | 12.72          |
| 8        | 9.24541      | 5.70       | 6.99        | 13.98   | 8.39             | 14.62          |
| 14       | 11.2         | 9.98       | 11.90       | 18.49   | 13.08            | 19.12          |
| 20       | 14.20553     | 14.26      | 16.56       | 22.10   | 17.36            | 22.65          |
| 22       | 15.27411     | 15.68      | 18.06       | 23.18   | 18.72            | 23.69          |
| 24       | 17.95354     | 17.11      | 19.53       | 24.21   | 20.06            | 24.67          |
| 26       | 19.08592     | 18.53      | 20.97       | 25.20   | 21.37            | 25.61          |
| 28       | 22.62659     | 19.96      | 22.39       | 26.15   | 22.67            | 26.51          |
| 30       | 26.62978     | 21.39      | 23.78       | 27.07   | 23.94            | 27.38          |
| 32       | 29.10984     | 22.81      | 25.15       | 27.96   | 25.20            | 28.21          |
| 39       | 30.52        | 27.80      | 29.75       | 30.86   | 29.48            | 30.91          |
| 45       | 31.23105     | 32.08      | 33.46       | 33.15   | 33.03            | 33.00          |
| 47       | 33.38416     | 33.50      | 34.66       | 33.88   | 34.19            | 33.66          |
| 49       | 37.16407     | 34.93      | 35.83       | 34.59   | 35.34            | 34.30          |
| 51       | 39.01415     | 36.36      | 36.98       | 35.29   | 36.48            | 34.93          |
| 53       | 41.6856      | 37.78      | 38.11       | 35.98   | 37.61            | 35.54          |
| 55       | 42.80202     | 39.21      | 39.22       | 36.65   | 38.73            | 36.14          |
| 61       | 43           | 43.48      | 42.44       | 38.60   | 42.05            | 37.86          |
| 68       | 43.92643     | 48.47      | 45.97       | 40.75   | 45.83            | 39.73          |
| 70       | 43.86263     | 49.90      | 46.94       | 41.35   | 46.90            | 40.25          |
| 72       | 44.58033     | 51.33      | 47.89       | 41.93   | 47.96            | 40.75          |

**Table. S3:** experimental and predicted cumulative release values for various kinetic models at pH=5.4 and temperature 37 °C

| Time<br>(h) | CDR (%)      |            |             |         |                      |                    |
|-------------|--------------|------------|-------------|---------|----------------------|--------------------|
|             | Experimental | predicted  |             |         |                      |                    |
|             |              | Zero-order | First-order | Higuchi | Korsmeyer<br>-Peppas | Baker-<br>Lonsdale |
| 0           | 0            | 0.00       | 0.00        | 0.00    | 0.00                 | 0.06               |
| 2           | 6.80581      | 2.38       | 3.69        | 11.75   | 5.78                 | 13.23              |
| 4           | 12.47672     | 4.77       | 7.24        | 16.62   | 9.57                 | 18.46              |
| 6           | 15.44405     | 7.15       | 10.66       | 20.36   | 12.85                | 22.38              |
| 8           | 19.37327     | 9.54       | 13.96       | 23.51   | 15.84                | 25.62              |
| 14          | 22.5         | 16.69      | 23.13       | 31.10   | 23.80                | 33.17              |
| 20          | 26.55113     | 23.84      | 31.33       | 37.17   | 30.85                | 38.95              |
| 22          | 30.23534     | 26.22      | 33.86       | 38.98   | 33.07                | 40.63              |
| 24          | 31.26075     | 28.61      | 36.30       | 40.72   | 35.23                | 42.22              |
| 26          | 33.20267     | 30.99      | 38.65       | 42.38   | 37.34                | 43.73              |
| 28          | 38.80158     | 33.37      | 40.91       | 43.98   | 39.41                | 45.16              |
| 30          | 41.32427     | 35.76      | 43.09       | 45.52   | 41.44                | 46.53              |
| 32          | 46.60558     | 38.14      | 45.19       | 47.01   | 43.43                | 47.83              |
| 39          | 50.2         | 46.48      | 51.95       | 51.90   | 50.16                | 52.02              |
| 45          | 55.60739     | 53.63      | 57.07       | 55.75   | 55.66                | 55.21              |
| 47          | 57.96674     | 56.02      | 58.65       | 56.98   | 57.45                | 56.20              |
| 49          | 59.89959     | 58.40      | 60.18       | 58.18   | 59.22                | 57.16              |
| 51          | 63.66547     | 60.79      | 61.65       | 59.35   | 60.97                | 58.10              |
| 53          | 65.67091     | 63.17      | 63.06       | 60.51   | 62.70                | 59.01              |
| 55          | 69.96311     | 65.55      | 64.42       | 61.64   | 64.41                | 59.89              |
| 61          | 71.5         | 72.71      | 68.22       | 64.91   | 69.45                | 62.40              |
| 68          | 74.31883     | 81.05      | 72.13       | 68.54   | 75.17                | 65.10              |
| 70          | 73.74714     | 83.43      | 73.16       | 69.54   | 76.77                | 65.83              |
| 72          | 74.50031     | 85.82      | 74.15       | 70.52   | 78.36                | 66.54              |



**Table. S4:** experimental and predicted cumulative release values for various kinetic models at pH=7.2 and temperature 45 °C

| Time (h) | CDR (%)      |            |             |         |                  |                |
|----------|--------------|------------|-------------|---------|------------------|----------------|
|          | Experimental | Predicted  |             |         |                  |                |
|          |              | Zero-order | First-order | Higuchi | Korsmeyer-Peppas | Baker-Lonsdale |
| 0        | 0            | 0.00       | 0.00        | 0.00    | 0.00             | 0.06           |
| 2        | 5.18341      | 1.73       | 2.31        | 8.52    | 4.21             | 9.23           |
| 4        | 7.80202      | 3.46       | 4.58        | 12.06   | 6.97             | 12.94          |
| 6        | 11.54206     | 5.19       | 6.79        | 14.77   | 9.35             | 15.74          |
| 8        | 14.95513     | 6.91       | 8.94        | 17.05   | 11.52            | 18.07          |
| 14       | 16.5         | 12.10      | 15.12       | 22.55   | 17.30            | 23.56          |
| 20       | 18.83073     | 17.29      | 20.88       | 26.96   | 22.41            | 27.83          |
| 22       | 23.17682     | 19.02      | 22.71       | 28.27   | 24.02            | 29.09          |
| 24       | 24.01415     | 20.74      | 24.50       | 29.53   | 25.58            | 30.28          |
| 26       | 26.45434     | 22.47      | 26.25       | 30.74   | 27.11            | 31.41          |
| 28       | 28.9344      | 24.20      | 27.96       | 31.90   | 28.61            | 32.50          |
| 30       | 29.85944     | 25.93      | 29.62       | 33.02   | 30.08            | 33.54          |
| 32       | 31.5899      | 27.66      | 31.25       | 34.10   | 31.52            | 34.53          |
| 39       | 34.6         | 33.71      | 36.66       | 37.65   | 36.39            | 37.75          |
| 45       | 37.33153     | 38.90      | 40.96       | 40.44   | 40.37            | 40.23          |
| 47       | 40.78448     | 40.62      | 42.33       | 41.33   | 41.67            | 41.02          |
| 49       | 43.4958      | 42.35      | 43.66       | 42.20   | 42.95            | 41.78          |
| 51       | 46.64572     | 44.08      | 44.97       | 43.05   | 44.21            | 42.52          |
| 53       | 48.64732     | 45.81      | 46.24       | 43.88   | 45.46            | 43.24          |
| 55       | 50.67284     | 47.54      | 47.49       | 44.71   | 46.70            | 43.95          |
| 61       | 52.1         | 52.73      | 51.05       | 47.08   | 50.35            | 45.97          |
| 68       | 53.91845     | 58.78      | 54.90       | 49.71   | 54.48            | 48.16          |
| 70       | 54.42084     | 60.51      | 55.95       | 50.43   | 55.64            | 48.76          |
| 72       | 54.51654     | 62.23      | 56.97       | 51.15   | 56.79            | 49.35          |

**Table. S5:** experimental and predicted cumulative release values for various kinetic models at pH=5.4 and temperature 45 °C

| Time<br>(h) | CDR (%)      |            |             |         |                      |                    |
|-------------|--------------|------------|-------------|---------|----------------------|--------------------|
|             | Experimental | predicted  |             |         |                      |                    |
|             |              | Zero-order | First-order | Higuchi | Korsmeyer-<br>Peppas | Baker-<br>Lonsdale |
| 0           | 0            | 0.00       | 0.00        | 0.00    | 0.00                 | 0.06               |
| 2           | 6.66969      | 2.97       | 5.59        | 14.79   | 10.19                | 17.49              |
| 4           | 12.3406      | 5.94       | 10.87       | 20.92   | 15.66                | 24.29              |
| 6           | 14.39777     | 8.91       | 15.86       | 25.62   | 20.14                | 29.34              |
| 8           | 17.39868     | 11.88      | 20.56       | 29.59   | 24.07                | 33.48              |
| 14          | 30           | 20.78      | 33.16       | 39.14   | 34.05                | 42.99              |
| 20          | 41.32518     | 29.69      | 43.76       | 46.78   | 42.48                | 50.13              |
| 22          | 47.57472     | 32.66      | 46.91       | 49.07   | 45.07                | 52.18              |
| 24          | 53.47944     | 35.63      | 49.88       | 51.25   | 47.56                | 54.11              |
| 26          | 55.85422     | 38.60      | 52.68       | 53.34   | 49.99                | 55.92              |
| 28          | 56.44133     | 41.57      | 55.33       | 55.35   | 52.34                | 57.64              |
| 30          | 57.92681     | 44.54      | 57.83       | 57.30   | 54.62                | 59.27              |
| 32          | 61.23625     | 47.51      | 60.18       | 59.17   | 56.85                | 60.82              |
| 39          | 64.3         | 57.90      | 67.45       | 65.33   | 64.27                | 65.71              |
| 45          | 66.85966     | 66.81      | 72.61       | 70.17   | 70.24                | 69.36              |
| 47          | 71.21266     | 69.77      | 74.14       | 71.71   | 72.16                | 70.48              |
| 49          | 73.36057     | 72.74      | 75.59       | 73.22   | 74.04                | 71.56              |
| 51          | 74.61919     | 75.71      | 76.95       | 74.70   | 75.90                | 72.61              |
| 53          | 77.23897     | 78.68      | 78.24       | 76.16   | 77.74                | 73.62              |
| 55          | 84.42318     | 81.65      | 79.46       | 77.58   | 79.54                | 74.59              |
| 61          | 86.2         | 90.56      | 82.72       | 81.70   | 84.82                | 77.32              |
| 68          | 88.54932     | 100.95     | 85.87       | 86.26   | 90.73                | 80.19              |
| 70          | 89.82609     | 103.92     | 86.66       | 87.52   | 92.37                | 80.95              |
| 72          | 90.10104     | 106.89     | 87.41       | 88.76   | 94.00                | 81.69              |

**Table. S6:** Goodness of fit values for release process at pH=7.2 and temperature 37 °C

| Parameter              | Mechanism models |             |             |                             |                |
|------------------------|------------------|-------------|-------------|-----------------------------|----------------|
|                        | Zero-order       | First-order | Higuchi     | Korsmeyer-Peppas            | Baker-Lonsdale |
| <b>N-observed</b>      | 24               | 24          | 24          | 24                          | 24             |
| <b>DF</b>              | 23               | 23          | 23          | 22                          | 23             |
| <b>R_obs-pre</b>       | 0.9809           | 0.9881      | 0.9739      | 0.9866                      | 0.9685         |
| <b>Rsqr</b>            | 0.9491           | 0.9758      | 0.9017      | 0.9731                      | 0.8806         |
| <b>Rsqr_adj</b>        | 0.9491           | 0.9758      | 0.9017      | 0.9719                      | 0.8806         |
| <b>MSE</b>             | 11.3917          | 5.4220      | 22.0008     | 6.2842                      | 26.7062        |
| <b>MSE_root</b>        | 3.3752           | 2.3285      | 4.6905      | 2.5068                      | 5.1678         |
| <b>Weighting</b>       | 1                | 1           | 1           | 1                           | 1              |
| <b>SS</b>              | 262.0082         | 124.7058    | 506.017     | 138.2526                    | 614.2436       |
| <b>WSS</b>             | 262.0082         | 124.7058    | 506.017     | 138.2526                    | 614.2436       |
| <b>AIC</b>             | 135.6410         | 117.8230    | 151.437     | 122.2980                    | 156.0894       |
| <b>MSC</b>             | 2.7598           | 3.5022      | 2.1016      | 3.3157                      | 1.9077         |
| <b>Model parameter</b> | $k_0=0.713$      | $k_1=0.009$ | $k_H=4.942$ | $k_{KP}=1.611$<br>$n=0.794$ | $k_{BL}=0.000$ |

**Table. S7:** Goodness of fit values for release process at pH=5.4 and temperature 37 °C

| Parameter              | Mechanism models |             |             |                             |                |
|------------------------|------------------|-------------|-------------|-----------------------------|----------------|
|                        | Zero-order       | First-order | Higuchi     | Korsmeyer-Peppas            | Baker-Lonsdale |
| <b>N-observed</b>      | 24               | 24          | 24          | 24                          | 24             |
| <b>DF</b>              | 23               | 23          | 23          | 22                          | 23             |
| <b>R_obs-pre</b>       | 0.9878           | 0.9901      | 0.9818      | 0.9930                      | 0.9693         |
| <b>Rsqr</b>            | 0.9389           | 0.9799      | 0.9370      | 0.9860                      | 0.8953         |
| <b>Rsqr_adj</b>        | 0.9389           | 0.9799      | 0.9370      | 0.9854                      | 0.8953         |
| <b>MSE</b>             | 33.5739          | 11.0274     | 34.6140     | 8.0402                      | 57.5681        |
| <b>MSE_root</b>        | 5.7943           | 3.3207      | 5.8834      | 2.8355                      | 7.5874         |
| <b>Weighting</b>       | 1                | 1           | 1           | 1                           | 1              |
| <b>SS</b>              | 772.2005         | 253.6291    | 796.1210    | 176.8839                    | 1324.0665      |
| <b>WSS</b>             | 772.2005         | 253.6291    | 796.1210    | 176.8839                    | 1324.0665      |
| <b>AIC</b>             | 161.5819         | 134.8610    | 162.3140    | 128.2118                    | 174.5231       |
| <b>MSC</b>             | 2.5511           | 3.6645      | 2.5206      | 3.9415                      | 2.0119         |
| <b>Model parameter</b> | $k_0=1.192$      | $k_1=0.019$ | $k_H=8.311$ | $k_{KP}=3.488$<br>$n=0.728$ | $k_{BL}=0.002$ |

**Table. S8:** Goodness of fit values for release process at pH=7.2 and temperature 45 °C

| Parameter              | Mechanism models |             |             |                             |                |
|------------------------|------------------|-------------|-------------|-----------------------------|----------------|
|                        | Zero-order       | First-order | Higuchi     | Korsmeyer-Peppas            | Baker-Lonsdale |
| <b>N-observed</b>      | 24               | 24          | 24          | 24                          | 24             |
| <b>DF</b>              | 23               | 23          | 23          | 22                          | 23             |
| <b>R_obs-pre</b>       | 0.9884           | 0.9928      | 0.9819      | 0.9932                      | 0.9746         |
| <b>Rsqr</b>            | 0.9388           | 0.9797      | 0.9382      | 0.9863                      | 0.9127         |
| <b>Rsqr_adj</b>        | 0.9388           | 0.9797      | 0.9382      | 0.9856                      | 0.9127         |
| <b>MSE</b>             | 17.5776          | 5.8319      | 17.7762     | 4.1260                      | 25.0974        |
| <b>MSE_root</b>        | 4.1926           | 2.4149      | 4.2162      | 2.0313                      | 5.0097         |
| <b>Weighting</b>       | 1                | 1           | 1           | 1                           | 1              |
| <b>SS</b>              | 404.2855         | 134.1334    | 408.8517    | 90.7722                     | 577.2395       |
| <b>WSS</b>             | 404.2855         | 134.1334    | 408.8517    | 90.7722                     | 577.2395       |
| <b>AIC</b>             | 146.0509         | 119.5720    | 146.3205    | 112.2005                    | 154.5982       |
| <b>MSC</b>             | 2.5484           | 3.6517      | 2.5372      | 3.9588                      | 2.1923         |
| <b>Model parameter</b> | $k_0=0.864$      | $k_1=0.012$ | $k_H=6.028$ | $k_{KP}=2.548$<br>$n=0.726$ | $k_{BL}=0.001$ |

**Table. S9:** Goodness of fit values for release process at pH=5.4 and temperature 45 °C

| Parameter              | Mechanism models |             |              |                             |                |
|------------------------|------------------|-------------|--------------|-----------------------------|----------------|
|                        | Zero-order       | First-order | Higuchi      | Korsmeyer-Peppas            | Baker-Lonsdale |
| <b>N-observed</b>      | 24               | 24          | 24           | 24                          | 24             |
| <b>DF</b>              | 23               | 23          | 23           | 22                          | 23             |
| <b>R_obs-pre</b>       | 0.9671           | 0.9952      | 0.9911       | 0.9919                      | 0.9829         |
| <b>Rsqr</b>            | 0.8648           | 0.9901      | 0.9650       | 0.9831                      | 0.9214         |
| <b>Rsqr_adj</b>        | 0.8648           | 0.9901      | 0.9650       | 0.9824                      | 0.9214         |
| <b>MSE</b>             | 107.4380         | 7.8903      | 27.8178      | 14.0041                     | 62.4775        |
| <b>MSE_root</b>        | 10.3652          | 2.8090      | 5.2743       | 3.7422                      | 7.9043         |
| <b>Weighting</b>       | 1                | 1           | 1            | 1                           | 1              |
| <b>SS</b>              | 2471.0744        | 181.4760    | 639.8090     | 308.0902                    | 1436.9815      |
| <b>WSS</b>             | 2471.0744        | 181.4760    | 639.8090     | 308.0902                    | 1436.9815      |
| <b>AIC</b>             | 189.4978         | 126.8270    | 157.0681     | 141.5294                    | 176.4872       |
| <b>MSC</b>             | 1.7364           | 4.3477      | 3.0877       | 3.7351                      | 2.2786         |
| <b>Model parameter</b> | $k_0=1.485$      | $k_1=0.029$ | $k_H=10.461$ | $k_{KP}=6.629$<br>$n=0.620$ | $k_{BL}=0.003$ |
